# Supplementary material for: Scalable training of artificial neural networks with adaptive sparse connectivity inspired by network science
Source: PubMed Central journal article supplement (PMC6008460; doi:10.1038/s41467-018-04316-3), 2018-06-19
Supplement: 41467_2018_4316_MOESM1_ESM.pdf [file 41467_2018_4316_MOESM1_ESM.pdf]

# **Supplementary Information: Scalable Training of Artificial Neural Networks with Adaptive Sparse Connectivity inspired by Network Science**

**Mocanu et al.\***

\*Corresponding author: [d.c.mocanu@tue.nl](mailto:d.c.mocanu@tue.nl)

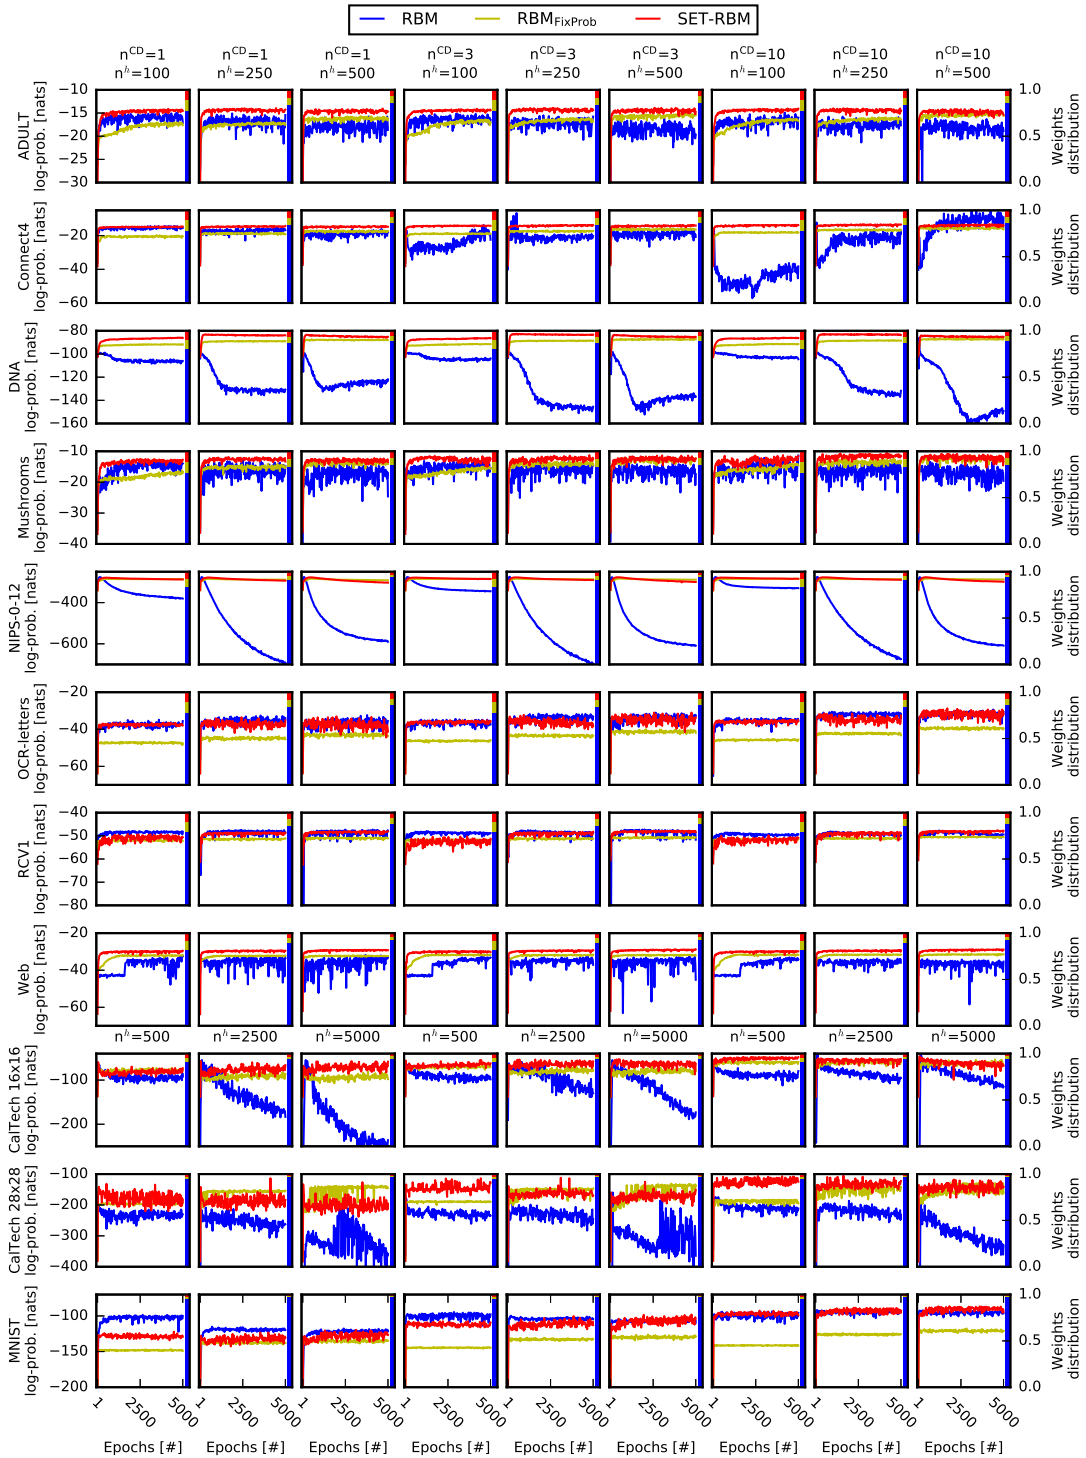

**Supplementary Figure 1.** Experiments with RBM variants using 11 benchmark datasets. For each model studied we have considered three cases for the number of Contrastive Divergence steps  $n^{CD} = \{1, 3, 10\}$ , and three cases for the number of hidden neurons ( $n^h$ ). For the first 8 datasets (from top to bottom) we have used  $n^h = \{100, 250, 500\}$ , and for the last three datasets we have used  $n^h = \{500, 2500, 5000\}$ . The  $x$ -axes show the training epochs; the left  $y$ -axes show the average log-probabilities computed on the test data with Annealed Importance Sampling (AIS); and the right  $y$ -axes (the stacked bar on the right part of the plots) reflect the fraction given by the  $n^W$  of each model over the sum of the  $n^W$  of all three models. Overall, SET-RBM outperforms the other two models in most of the cases. Also, it is interesting to see that SET-RBM and RBM<sub>FixProb</sub> are much more stable and do not present the over-fitting problems of RBM.

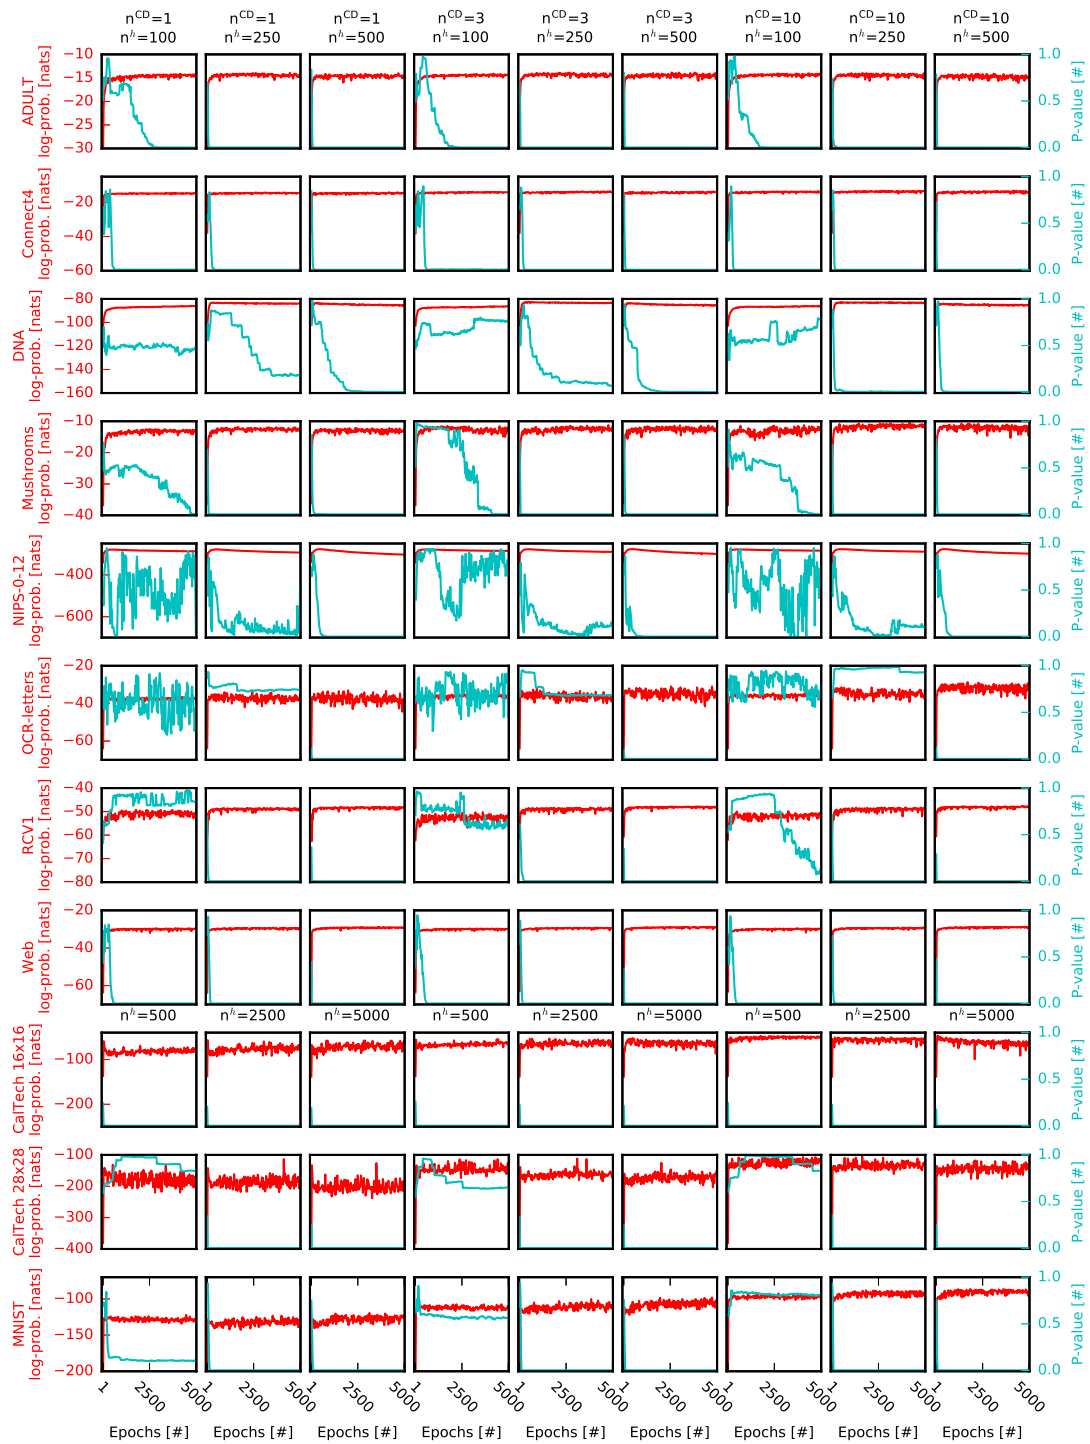

**Supplementary Figure 2.** SET-RBM evolution towards a scale-free topology. We have considered three cases for the number of Contrastive Divergence steps  $n^{CD} = \{1, 3, 10\}$ , and three cases for the number of hidden neurons ( $n^h$ ). For the first 8 datasets (from top to bottom) we have used  $n^h = \{100, 250, 500\}$ , and for the last three datasets we have used  $n^h = \{500, 2500, 5000\}$ . The  $x$ -axes show the training epochs; the left  $y$ -axes (red color) show the average log-probabilities computed for SET-RBMs on the test data with AIS; and the right  $y$ -axes (cyan color) show the  $p$ -values computed between the degree distribution of the hidden neurons in SET-RBM and a power-law distribution. We may observe that for models with a high enough number of hidden neurons, the SET-RBM topology always tends to become scale-free.
